# Supplementary material
Source: PubMed Central journal article supplement (PMC6775541)
Supplement: bi9b00592_si_001.pdf [file bi9b00592_si_001.pdf]

## Using Tetracysteine-Tagged TDP-43 with a Biarsenical Dye To Monitor Real-Time Trafficking in a Cell Model of Amyotrophic Lateral Sclerosis

Janice S. W. Ng<sup>1\*\*</sup>, Maya A. Hanspal<sup>1\*\*</sup>, Naunehal S. Matharu<sup>1</sup>, Teresa P. Barros<sup>1</sup>, Elin K. Esbjörner<sup>2</sup>, Mark R. Wilson<sup>3,4</sup>, Justin J. Yerbury<sup>3,4</sup>, Christopher M. Dobson<sup>1</sup> and Janet R. Kumita<sup>1\*</sup>

<sup>1</sup>Centre for Misfolding Diseases, Department of Chemistry, University of Cambridge, Lensfield Road, Cambridge, CB2 1EW, UK; <sup>2</sup>Department of Biology and Biological Engineering, Division of Chemical Biology, Chalmers University of Technology, Kemivägen 10, 412 96 Gothenburg, Sweden; <sup>3</sup>Illawarra Health and Medical Research Institute, Wollongong, NSW, Australia; <sup>4</sup>Molecular Horizons and School of Chemistry and Molecular Bioscience, Faculty of Science Medicine and Health, University of Wollongong, Northfields Avenue, Wollongong, NSW, 2522, Australia.

Running Title: *Real-time imaging of TDP-43 trafficking in ALS*

\*\*Authors contributed equally

\*To whom correspondence should be addressed: Janet R. Kumita: Centre for Misfolding Diseases, Department of Chemistry, University of Cambridge, Lensfield Road, Cambridge, CB2 1EW, UK, [jrk38@cam.ac.uk](mailto:jrk38@cam.ac.uk), Tel. +44(0)1223 761 480

## Supplementary methods

### Transfection efficiency

SH-SY5Y cells expressing HA-TDP43 or HA-TDP43-TC were fixed and immunostained with anti-HA antibody and nuclear counterstain Hoechst, 24 h post-transfection (via lipofection or electroporation). These samples were then imaged using confocal microscopy at 40x magnification, and the number of green (HA-TDP43 or HA-TDP43-TC) and blue (Hoechst) stained cells present in each image were manually counted using the Cell Counter plug-in in ImageJ. The transfection efficiency was calculated as the number of green transfected cells as a percentage of the total number of blue Hoechst-stained cells counted in each image.

### Quantification and comparison of nuclear FIAsh fluorescence in cells transfected with the HA-TDP43-TC plasmid using either lipofection or electroporation

SH-SY5Y cells were transfected with HA-TDP43-TC using both lipofection and electroporation methods and imaged using confocal microscopy 24 h post-transfection. The nuclear fluorescence in transfected cells was quantified as described in the methods section. A two-tailed unpaired Student t-test was performed on the mean fluorescence for each transfection method using GraphPad Prism version 7 for Mac OS X (GraphPad Software, La Jolla California USA) to determine whether or not there was a significant difference in the intensity of nuclear fluorescence between the two different transfection methods.

### Supplementary tables and figures

**Table S1.** Oligonucleotide sequences of primers used.

| Primer name        | Sequence                                                                        |
|--------------------|---------------------------------------------------------------------------------|
| TDP43-TC (forward) | 5'-AATTGGATCCATGTACCCATACGACGTCCCAGACT<br>ACGCTTCTGAATATATTCTGGGTAAC-3'         |
| TDP43-TC (reverse) | 5'-CTAGTCTAGACTAGGGCTCCATGCAACAGCCTGGA<br>CAGCAGTTCAGGAACATTCCCCAGCCAGAAGACT-3' |
| HA-TDP43 (forward) | 5'-AATTGGATCCATGTACCCATACGACGTCC-3'                                             |
| HA-TDP43 (reverse) | 5'-CTAGTCTAGAAGCTTCTACATTCCCCAGCCAG-3'                                          |

**Table S2.** Transfection efficiency of SH-SY5Y cells transfected with HA-TDP43 or HA-TDP43-TC plasmid using either lipofection or electroporation

|                    | <b>Transfection method</b> | <b>Number of green cells</b> | <b>Number of blue cells</b> | <b>efficiency (%)</b> |
|--------------------|----------------------------|------------------------------|-----------------------------|-----------------------|
| <b>HA-TDP43</b>    | Lipofection                | 264                          | 2648                        | 9.97                  |
|                    | Electroporation            | 53                           | 374                         | 14.17                 |
| <b>HA-TDP43-TC</b> | Lipofection                | 236                          | 1947                        | 12.12                 |
|                    | Electroporation            | 44                           | 312                         | 14.10                 |

**Table S3.** Nuclear fluorescence values from SH-SY5Y cells expressing HA-TDP43-TC using both lipofection and electroporation methods 24 h post-transfection.

| <b>HA-TDP43-TC lipofection</b>     |                    |                      |
|------------------------------------|--------------------|----------------------|
| Area of measurement                | Integrated density | Nuclear fluorescence |
| 92.364                             | 2574.874           | 2252.985             |
| 82.204                             | 1430.486           | 1144.005             |
| 104.14                             | 1566.261           | 1203.333             |
| 96.982                             | 1213.431           | 875.449              |
| 63.731                             | 1621.448           | 1399.346             |
| 54.957                             | 2458.034           | 2266.509             |
| 60.96                              | 881.151            | 668.705              |
| 78.059                             | 1216.663           | 943.059              |
| Mean background grey value         | 3.485              |                      |
| <b>HA-TDP43-TC electroporation</b> |                    |                      |
| Area of measurement                | Integrated density | Nuclear fluorescence |
| 78.509                             | 1636.226           | 1335.327             |
| 65.347                             | 2008.453           | 1757.999             |
| 94.673                             | 2441.639           | 2078.789             |
| 111.76                             | 1719.123           | 1290.784             |
| 99.522                             | 4858.802           | 4477.367             |
| Mean background grey value         | 3.833              |                      |

**A**

DNA sequence for HA-TDP43:

AATT**GGATCC**ATG**TACCCATACGACGTCCCAGACTACGCT**TCTGAATATATTCG  
GGTAACCGAAGATGAGAACGATGAGCCATTGAAATACCATCGGAAGACGATG  
GGACGGTGCTGCTCTCCACGGTTACAGCCCAGTTTCCAGGGCGTGTGGGCTT  
CGCTACAGGAATCCAGTGTCTCAGTGTATGAGAGGTGTCCGGCTGGTAGAAGG  
AATTCTGCATGCCCCAGATGCTGGCTGGGGAAATCTGGTGTATGTTGTCAACTA  
TCCAAAAGATAACAAAAGAAAAATGGATGAGACAGATGCTTCATCAGCAGTGAA  
AGTGAAAAGAGCAGTCCAGAAAACATCCGATTTAATAGTGTGGGTCTCCCATG  
GAAAACAACCGAACAGGACCTGAAAGAGTATTTTAGTACCTTTGGAGAAGTTCT  
TATGGTGCAAGTCAAGAAAAGATCTTAAGACTGGTCATTCAAAGGGTTTGGCTT  
TGTTCTGTTTTACGGAATATGAAACACAAGTAAAGTAATGTCACAGCGACATAT  
GATAGATGGACGATGGTGTGACTGCAAACCTCCTAATTCTAAGCAAAGCCAAGA  
TGAGCCTTTGAGAAGCAGAAAAGTGTGGTGGGGCGCTGTACAGAGGACATGA  
CTGAGGATGAGCTGCGGGAGTTCTTCTCTCAGTACGGGGATGTGATGGATGTC  
TTCATCCCCAAGCCATTCAAGGGCCTTTCCTTTGTTACATTTGCAGATGATCAG  
ATTGCGCAGTCTCTTTGTGGAGAGGACTTGATCATTAAAGGAATCAGCGTTCAT  
ATATCCAATGCCGAACCTAAGCACAATAGCAATAGACAGTTAGAAAAGAAAGTGA  
AGATTTGGTGGTAATCCAGGTGGCTTTGGGAATCAGGGTGGATTTGGTAATAGC  
AGAGGGGGTGGAGCTGGTTTGGGAAACAATCAAGGTAGTAATATGGGTGGTGG  
GATGAACTTTGGTGCCTTCAGCATTAAATCCAGCCATGATGGCTGCCGCCCAGG  
CAGCACTACAGAGCAGTTGGGGTATGATGGGCATGTTAGCCAGCCAGCAGAAC  
CAGTCAGGCCCATCGGGTAATAACCAAACCAAGGCAACATGCAGAGGGAGCC  
AAACCAGGCCTTCGGTTCTGGAATAACTCTTATAGTGGCTCTAATTCTGGTGC  
AGCAATTGGTTGGGGATCAGCATCCAATGCAGGGTCCGGCAGTGGTTTAATG  
GAGGCTTTGGCTCAAGCATGGATTCTAAGTCTTCTGGCTGGGGAATGTAGAAG  
CT**TCTAGACT**AG

**B**

DNA sequence for HA-TDP43-TC:

AATT**GGATCC**ATG**TACCCATACGACGTCCCAGACTACGCT**TCTGAATATATTCG  
GGTAACCGAAGATGAGAACGATGAGCCATTGAAATACCATCGGAAGACGATG  
GGACGGTGCTGCTCTCCACGGTTACAGCCCAGTTTCCAGGGCGTGTGGGCTT  
CGCTACAGGAATCCAGTGTCTCAGTGTATGAGAGGTGTCCGGCTGGTAGAAGG  
AATTCTGCATGCCCCAGATGCTGGCTGGGGAAATCTGGTGTATGTTGTCAACTA  
TCCAAAAGATAACAAAAGAAAAATGGATGAGACAGATGCTTCATCAGCAGTGAA  
AGTGAAAAGAGCAGTCCAGAAAACATCCGATTTAATAGTGTGGGTCTCCCATG  
GAAAACAACCGAACAGGACCTGAAAGAGTATTTTAGTACCTTTGGAGAAGTTCT  
TATGGTGCAAGTCAAGAAAAGATCTTAAGACTGGTCATTCAAAGGGTTTGGCTT  
TGTTCTGTTTTACGGAATATGAAACACAAGTAAAGTAATGTCACAGCGACATAT  
GATAGATGGACGATGGTGTGACTGCAAACCTCCTAATTCTAAGCAAAGCCAAGA  
TGAGCCTTTGAGAAGCAGAAAAGTGTGGTGGGGCGCTGTACAGAGGACATGA  
CTGAGGATGAGCTGCGGGAGTTCTTCTCTCAGTACGGGGATGTGATGGATGTC  
TTCATCCCCAAGCCATTCAAGGGCCTTTCCTTTGTTACATTTGCAGATGATCAG  
ATTGCGCAGTCTCTTTGTGGAGAGGACTTGATCATTAAAGGAATCAGCGTTCAT  
ATATCCAATGCCGAACCTAAGCACAATAGCAATAGACAGTTAGAAAAGAAAGTGA  
AGATTTGGTGGTAATCCAGGTGGCTTTGGGAATCAGGGTGGATTTGGTAATAGC  
AGAGGGGGTGGAGCTGGTTTGGGAAACAATCAAGGTAGTAATATGGGTGGTGG  
GATGAACTTTGGTGCCTTCAGCATTAAATCCAGCCATGATGGCTGCCGCCCAGG  
CAGCACTACAGAGCAGTTGGGGTATGATGGGCATGTTAGCCAGCCAGCAGAAC  
CAGTCAGGCCCATCGGGTAATAACCAAACCAAGGCAACATGCAGAGGGAGCC  
AAACCAGGCCTTCGGTTCTGGAATAACTCTTATAGTGGCTCTAATTCTGGTGC  
AGCAATTGGTTGGGGATCAGCATCCAATGCAGGGTCCGGCAGTGGTTTAATG  
GAGGCTTTGGCTCAAGCATGGATTCTAAGTCTTCTGGCTGGGGAATG**TTCTGAA**  
**ACTGCTGTCCAGGCTGTTGCATGGAGCCCTAGTCTAGACT**AG

**Figure S1.** DNA sequences encoding A) HA-TDP43 and B) HA-TDP43-TC. Restriction enzyme sites (BamHI and XbaI) appear as underlined bold text. The DNA sequence encoding the HA-tag is highlighted yellow in A) and B), and the DNA sequence encoding the TC-tag in B) is highlighted in cyan.

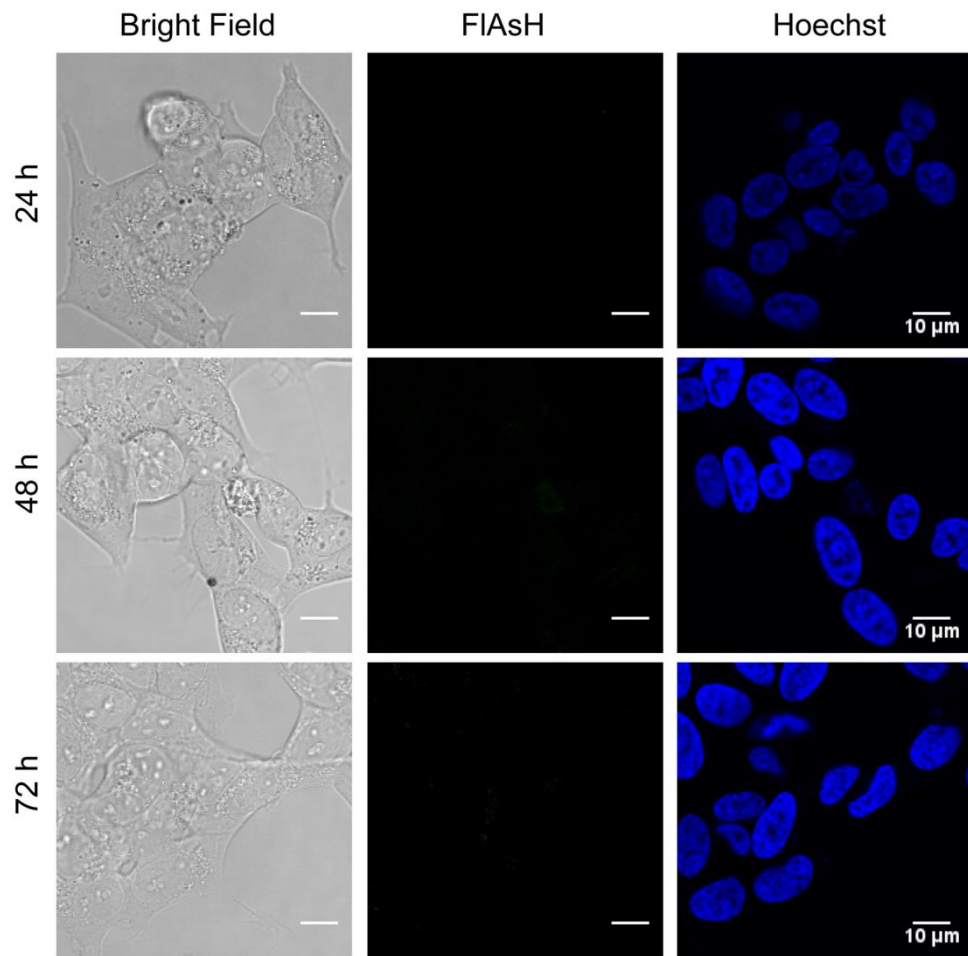

**Figure S2.** Confocal images showing HA-TDP43 (no TC-tag) in live SH-SY5Y cells at 24, 48 and 72 h post-transfection in the presence of FIAsH reagent (middle panels). No FIAsH signal is detected in the absence of the TC-tag. Bright field and Hoechst nuclear counterstain (blue) are shown for each time point.

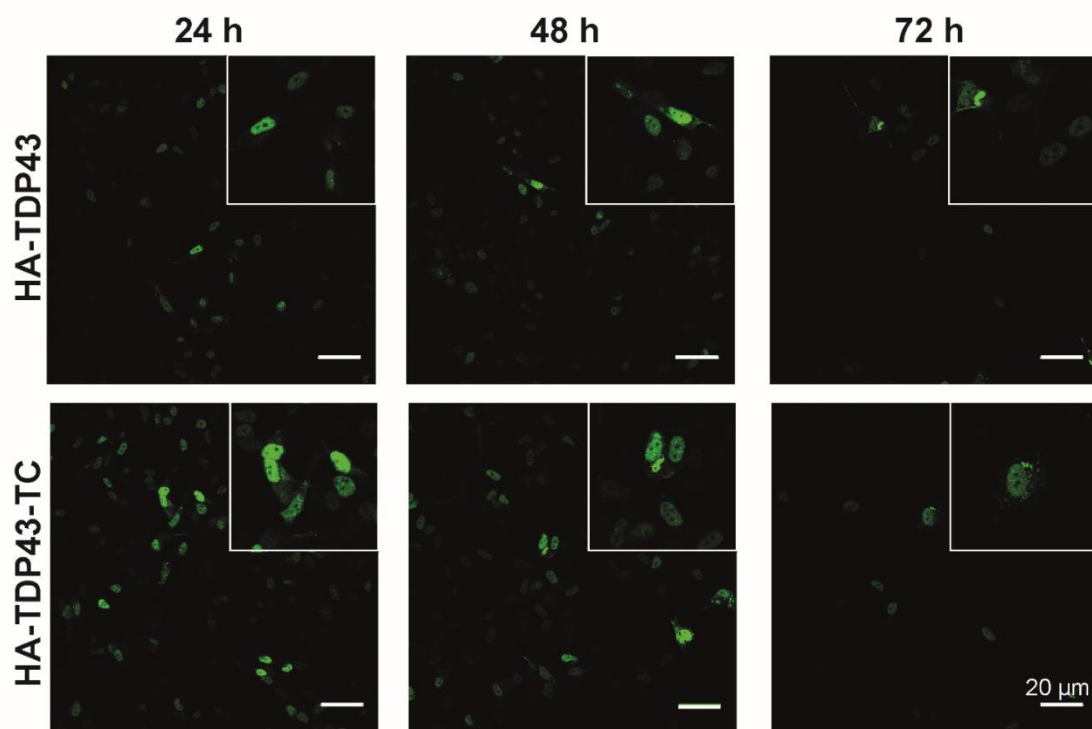

**Figure S3.** Confocal images showing the distribution of HA-TDP43 and HA-TDP43-TC in lipofected SH-SY5Y cells at 24, 48 and 72 h post-transfection, immunostained with anti-HA antibody (green). The inset white boxes contain zoomed images of the cell nucleus (zoom factor 2 x original image).

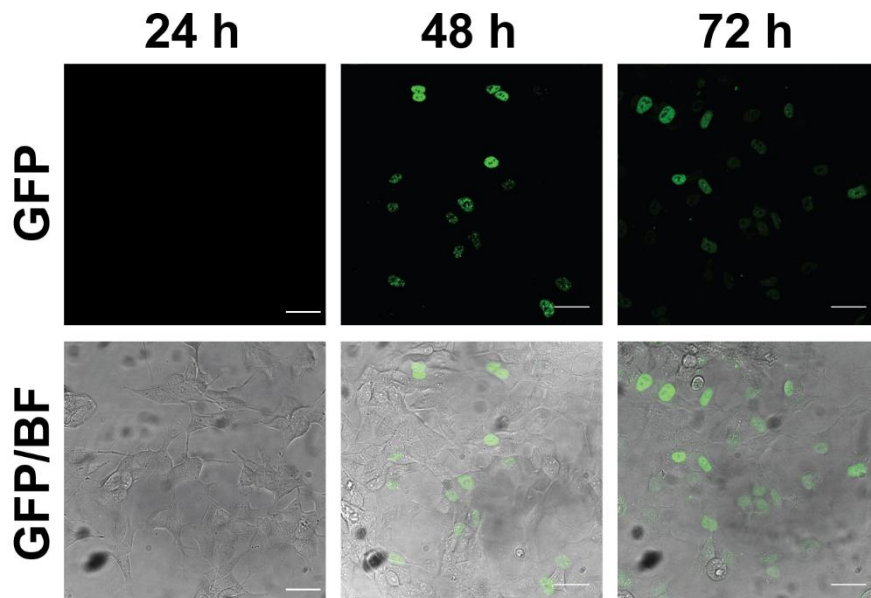

**Figure S4.** Confocal images showing the distribution of TDP43-GFP (green) in electroporated SH-SY5Y cells at 24, 48 and 72 h post-transfection. Cells were transfected with a pcDNA4/TO-TDP43-EGFP construct (GenScript, Piscataway, NJ USA) using protocols detailed in the materials and methods. Scale bars are 50 μm.

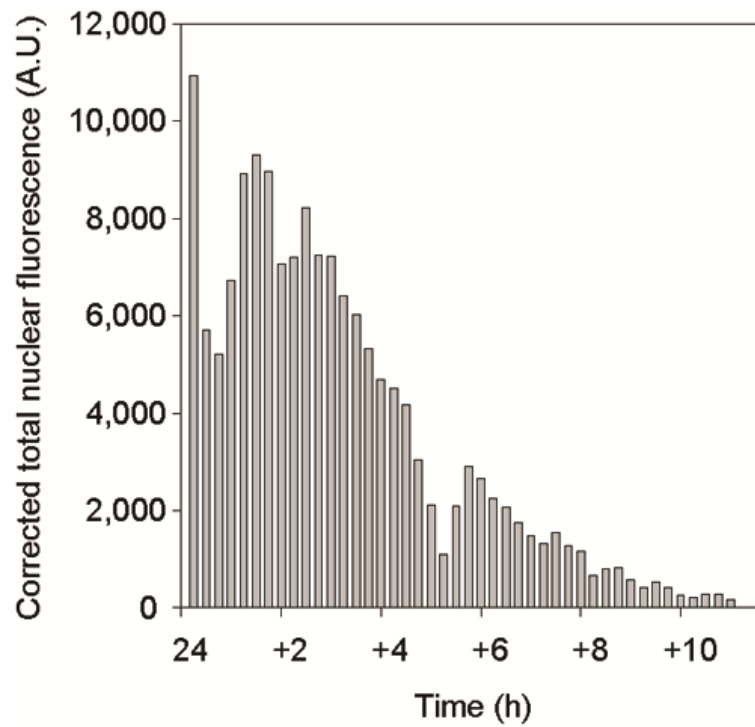

**Figure S5.** Histogram showing the loss of nuclear fluorescence over 11 h, using HA-TDP43-TC expressing SH-SY5Y cells labelled with FIAsH dye 24 h post-transfection using electroporation. Corrected total nuclear fluorescence was measured using ImageJ and calculated in Excel. The values were obtained from the representative experiment in Figure 7.



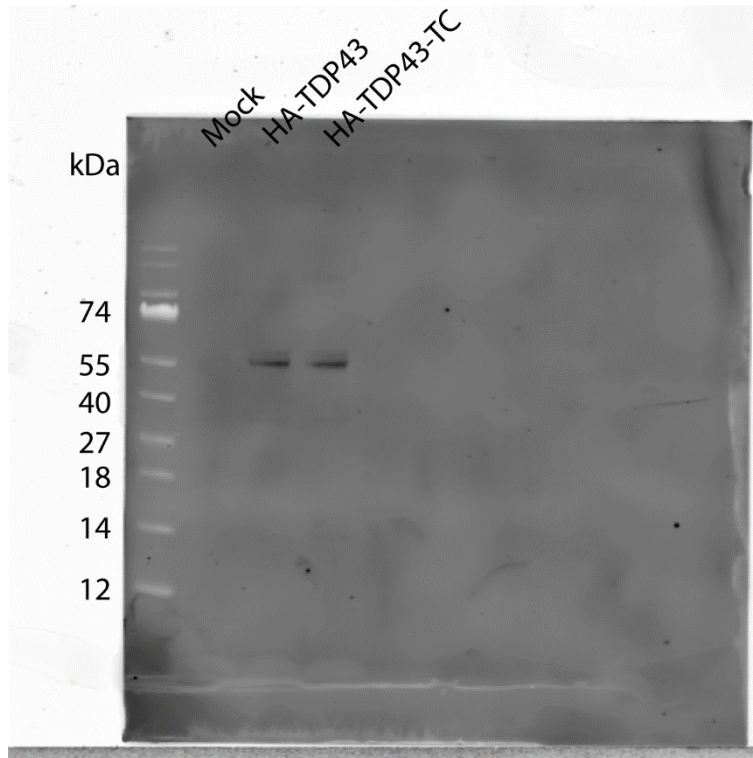

**Figure S6.** Full western blot from Figure 2, panel C. Western blot analysis following immunoprecipitation purification of HA-TDP43 and HA-TDP43-TC from SH-SY5Y cell lysates at 24 h post transfection. Mock transfection is cells transfected with buffer alone.

**Supplementary Video S1.** Time-lapse confocal microscopy video of HA-TDP43-TC expressing SH-SY5Y cells labelled with FIAsh dye. Imaging commenced at 24 h post-transfection using electroporation.
